# Supplementary material
Source: PubMed Central journal article supplement (PMC6405152)
Supplement: ASN.2018090906SupplementaryData.pdf [file ASN.2018090906SupplementaryData.pdf]

**Supplementary Figures:**

- 1A) Cumulative incidence for different causes of death – dialysis
- 1B) Cumulative incidence for different causes of death – transplant
- 2A) Cumulative incidence for different causes of death – dialysis (excluding pre-existing cancer)
- 2B) Cumulative incidence for different causes of death – transplant (excluding pre-existing cancer)
- 3A) Cumulative incidence of most common cancer deaths – dialysis (excluding pre-existing cancers)
- 3B) Cumulative incidence of most common cancer deaths – transplant (excluding pre-existing cancers)
- 4A) Cancer mortality rate and SMR by cancer type – dialysis (excluding pre-existing cancers)
- 4B) Cancer mortality rate and SMR by cancer type – transplant (excluding pre-existing cancers)
- 5A) Cancer incidence rate and SIR by cancer type – dialysis
- 5B) Cancer incidence rate and SIR by cancer type – transplant

**Supplementary Figure 1A: Cumulative incidence for different causes of death - dialysis**

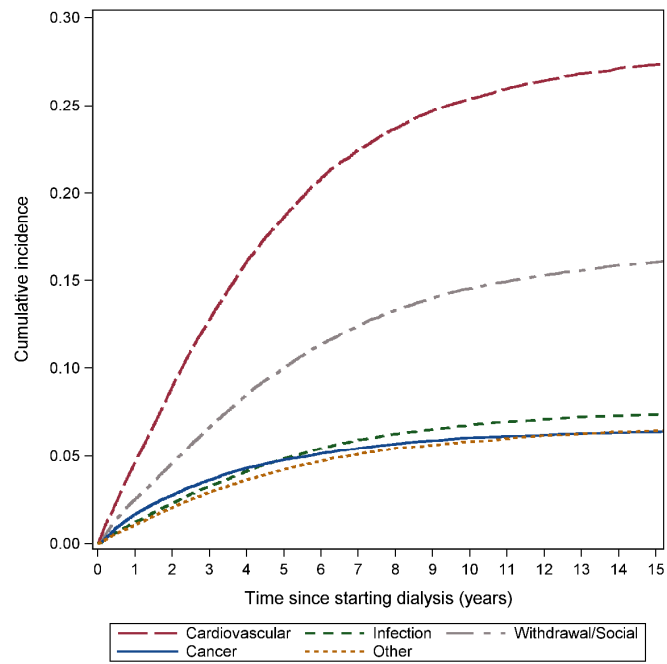

**Supplementary Figure 1B: Cumulative incidence for different causes of death - transplant**

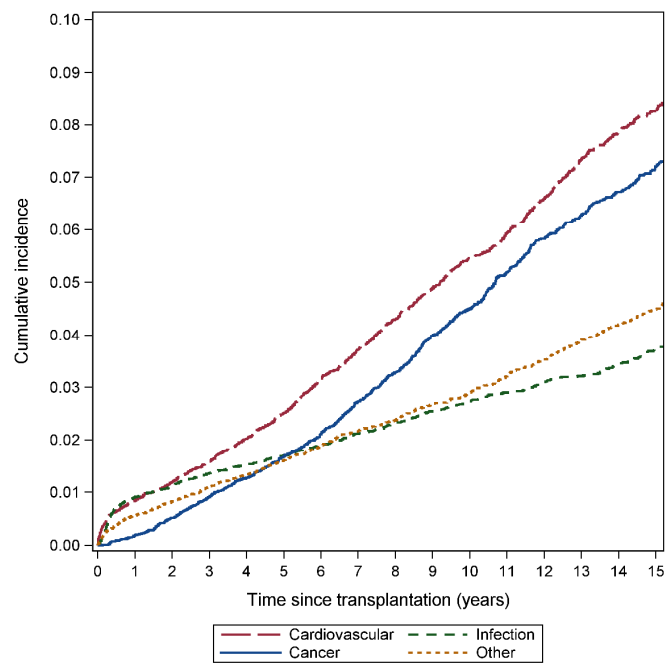

**Supplementary Figure 2A: Cumulative incidence for different causes of death – dialysis (excluding pre-existing cancers)**

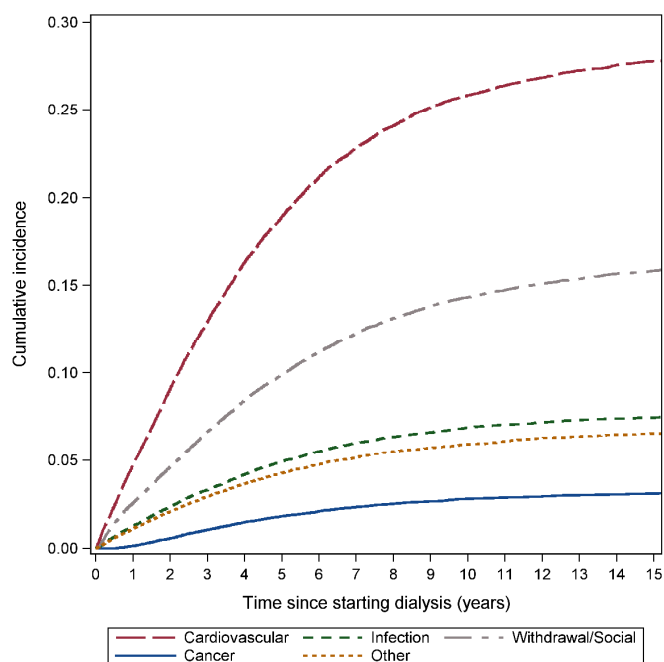

**Supplementary Figure 2B: Cumulative incidence for different causes of death – transplant (excluding pre-existing cancers)**

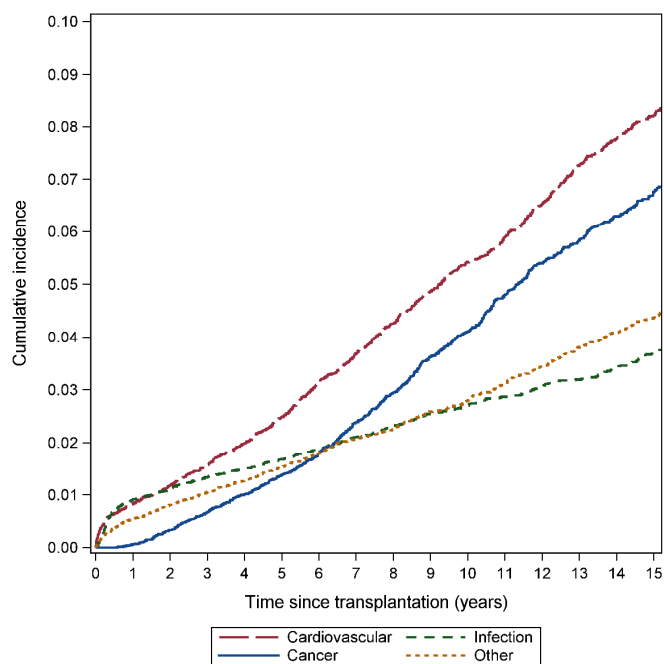

**Supplementary Figure 3A: Cumulative incidence of most common cancer deaths – dialysis (excluding pre-existing cancers)**

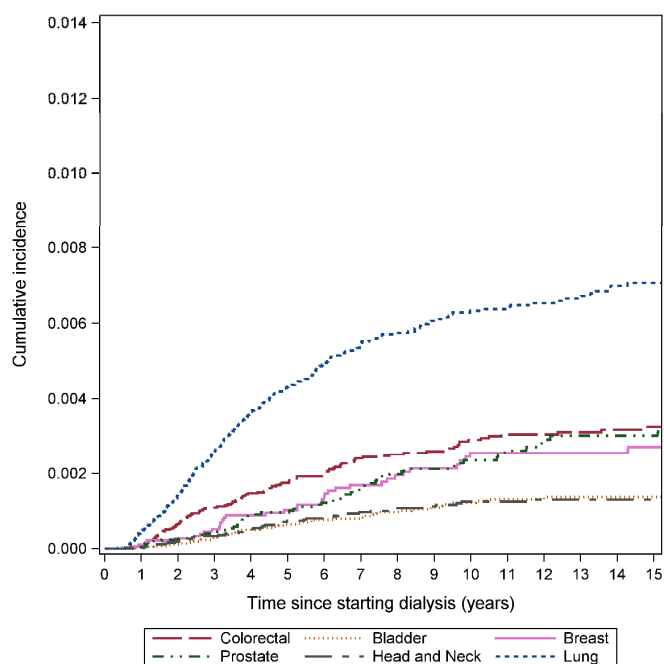

**Supplementary Figure 3B: Cumulative incidence of most common cancer deaths – transplant (excluding pre-existing cancers)**

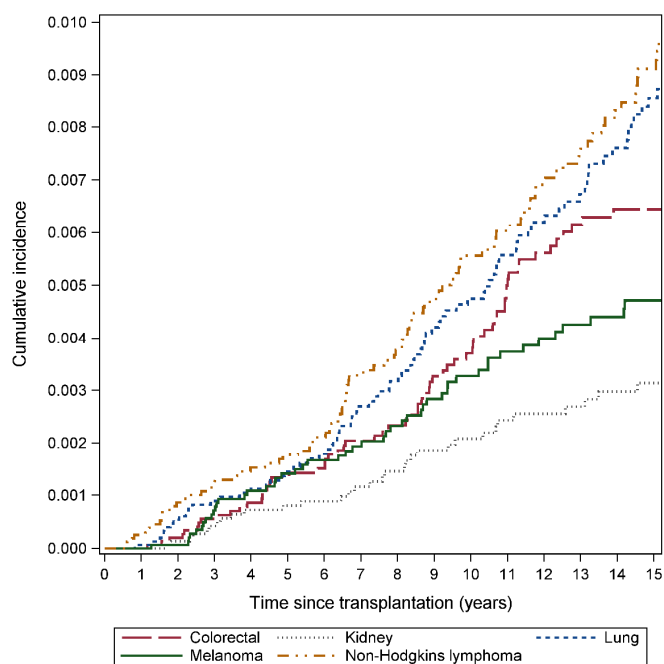

**Supplementary Figure 4A: Cancer mortality rate and SMR by cancer type – dialysis (excluding pre-existing cancers)**

| Cancer Type            | Mortality Rate<br>(per 100,000 pt-yrs) | SRD       | 95% CI           | SMR        | 95% CI             |
|------------------------|----------------------------------------|-----------|------------------|------------|--------------------|
| Bone                   | 3                                      | 1         | (0 - 4)          | 2.7        | (0.7 - 7.0)        |
| Kidney                 | 30                                     | 7         | (4 - 12)         | 2.4        | (1.7 - 3.2)        |
| Head and Neck          | 29                                     | 7         | (3 - 11)         | 2.0        | (1.4 - 2.7)        |
| Bladder                | 30                                     | 5         | (2 - 9)          | 1.9        | (1.4 - 2.5)        |
| Multiple Myeloma       | 20                                     | 4         | (1 - 7)          | 1.8        | (1.3 - 2.6)        |
| Unknown Primary        | 56                                     | 7         | (2 - 13)         | 1.4        | (1.1 - 1.8)        |
| Lung                   | 161                                    | 19        | (11 - 28)        | 1.4        | (1.2 - 1.6)        |
| Other Gastrointestinal | 113                                    | 7         | (0 - 15)         | 1.2        | (1.0 - 1.4)        |
| Melanoma               | 20                                     | 1         | (-2 - 5)         | 1.1        | (0.8 - 1.6)        |
| Colorectal             | 71                                     | 3         | (-3 - 11)        | 1.1        | (0.9 - 1.3)        |
| Non-Hogkin Lymphoma    | 20                                     | 0         | (-3 - 4)         | 1.0        | (0.7 - 1.4)        |
| Thyroid                | 1                                      | 0         | (-1 - 2)         | 0.9        | (0.1 - 3.4)        |
| Gynaecological         | 32                                     | -2        | (-9 - 7)         | 0.9        | (0.6 - 1.4)        |
| Leukaemia              | 18                                     | -1        | (-4 - 2)         | 0.9        | (0.6 - 1.3)        |
| Breast                 | 55                                     | -5        | (-15 - 7)        | 0.9        | (0.6 - 1.2)        |
| Brain                  | 11                                     | -1        | (-4 - 2)         | 0.8        | (0.5 - 1.3)        |
| Hodgkin Lymphoma       | 1                                      | 0         | (-1 - 2)         | 0.7        | (<0.1 - 4.1)       |
| Prostate               | 61                                     | -15       | (-20 - -8)       | 0.6        | (0.5 - 0.8)        |
| <b>All Cancers</b>     | <b>700</b>                             | <b>51</b> | <b>(33 - 71)</b> | <b>1.2</b> | <b>(1.1 - 1.3)</b> |

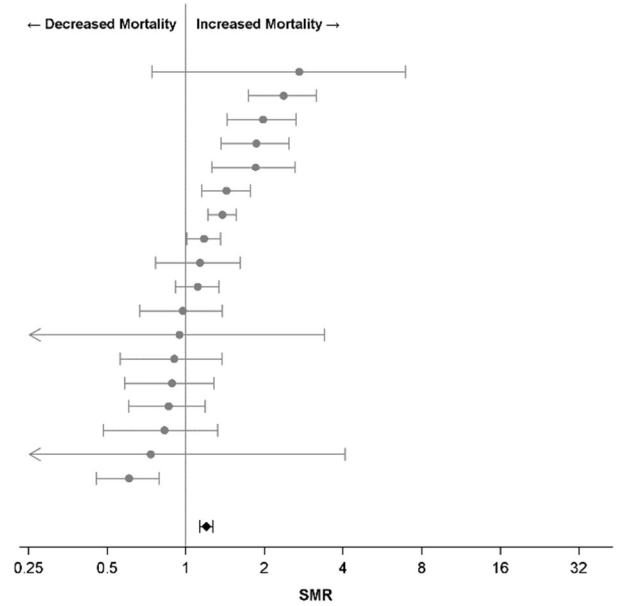

**Supplementary Figure 4B: Cancer mortality rate and SMR by cancer type – transplant (excluding pre-existing cancers)**

| Cancer Type            | Mortality Rate<br>(per 100,000 pt-yrs) | SRD        | 95% CI             | SMR        | 95% CI             |
|------------------------|----------------------------------------|------------|--------------------|------------|--------------------|
| Non-Hogkin Lymphoma    | 95                                     | 88         | (71 - 107)         | 10.4       | (8.6 - 12.4)       |
| Kidney                 | 35                                     | 28         | (19 - 40)          | 6.1        | (4.5 - 8.2)        |
| Hodgkin Lymphoma       | 2                                      | 2          | (0 - 8)            | 5.1        | (1.0 - 14.9)       |
| Melanoma               | 45                                     | 31         | (21 - 42)          | 5.1        | (3.8 - 6.6)        |
| Testicular             | 1                                      | 1          | (0 - 9)            | 4.5        | (0.1 - 25.2)       |
| Bladder                | 19                                     | 15         | (7 - 25)           | 3.4        | (2.2 - 5.1)        |
| Head and Neck          | 23                                     | 14         | (7 - 24)           | 3.1        | (2.1 - 4.4)        |
| Bone                   | 2                                      | 1          | (0 - 6)            | 3.0        | (0.4 - 10.7)       |
| Gynaecological         | 48                                     | 29         | (11 - 52)          | 2.5        | (1.6 - 3.7)        |
| Colorectal             | 65                                     | 41         | (26 - 59)          | 2.3        | (1.8 - 2.9)        |
| Unknown Primary        | 35                                     | 20         | (10 - 32)          | 2.2        | (1.6 - 3.0)        |
| Multiple Myeloma       | 9                                      | 4          | (0 - 11)           | 1.9        | (1.0 - 3.5)        |
| Leukaemia              | 16                                     | 8          | (1 - 16)           | 1.9        | (1.2 - 2.9)        |
| Lung                   | 76                                     | 24         | (10 - 41)          | 1.5        | (1.2 - 1.8)        |
| Brain                  | 12                                     | 3          | (-1 - 10)          | 1.5        | (0.8 - 2.4)        |
| Other Gastrointestinal | 63                                     | 19         | (6 - 33)           | 1.5        | (1.1 - 1.8)        |
| Thyroid                | 1                                      | 0          | (-1 - 4)           | 1.3        | (<0.1 - 7.1)       |
| Breast                 | 42                                     | 3          | (-12 - 24)         | 1.1        | (0.7 - 1.6)        |
| Prostate               | 18                                     | -16        | (-26 - -1)         | 0.6        | (0.3 - 1.0)        |
| <b>All Cancers</b>     | <b>673</b>                             | <b>417</b> | <b>(372 - 465)</b> | <b>2.6</b> | <b>(2.4 - 2.8)</b> |

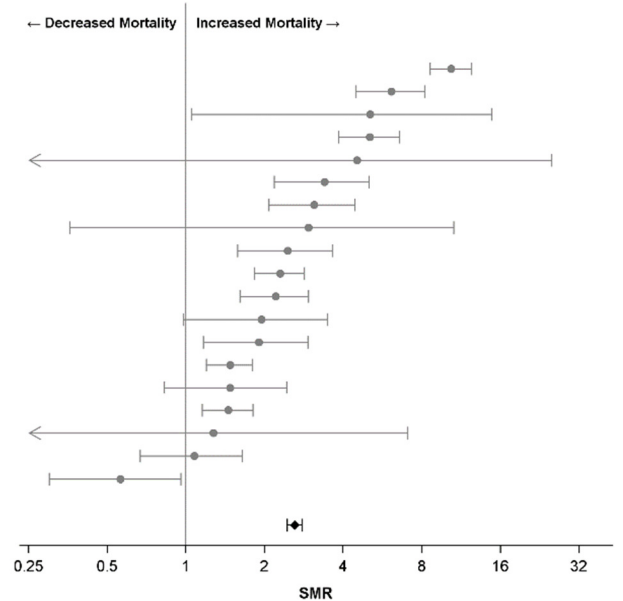

SMR - Standardized Mortality Ratio. SRD - Standardized Rate Difference. SRDs are presented in comparison with the general population. Non-Hodgkin lymphoma includes post-transplant lymphoproliferative disorder. Gynaecological cancers include cervical, uterine and ovarian cancers.

### Supplementary Figure 5A: Cancer incidence rate and SIR by cancer type – dialysis

| Cancer Type            | Incidence Rate<br>(per 100,000 pt-yrs) | SRD       | 95% CI           | SIR        | 95% CI             |
|------------------------|----------------------------------------|-----------|------------------|------------|--------------------|
| Kidney                 | 111                                    | 36        | (29 - 45)        | 3.7        | (3.1 - 4.3)        |
| Bone                   | 4                                      | 2         | (0 - 5)          | 3.0        | (1.1 - 6.6)        |
| Thyroid                | 30                                     | 15        | (8 - 23)         | 2.7        | (2.0 - 3.6)        |
| Bladder                | 84                                     | 19        | (13 - 26)        | 2.2        | (1.8 - 2.6)        |
| Multiple Myeloma       | 32                                     | 6         | (2 - 10)         | 1.7        | (1.3 - 2.3)        |
| Unknown Primary        | 61                                     | 10        | (4 - 16)         | 1.5        | (1.2 - 1.8)        |
| Other Gastrointestinal | 152                                    | 20        | (12 - 29)        | 1.4        | (1.3 - 1.6)        |
| Lung                   | 202                                    | 25        | (15 - 35)        | 1.4        | (1.2 - 1.6)        |
| Gynaecological         | 109                                    | 16        | (1 - 34)         | 1.3        | (1.0 - 1.7)        |
| Hodgkin Lymphoma       | 3                                      | 0         | (-2 - 4)         | 1.1        | (0.4 - 2.6)        |
| Head and Neck          | 53                                     | 2         | (-4 - 9)         | 1.1        | (0.9 - 1.3)        |
| Breast                 | 266                                    | 11        | (-13 - 37)       | 1.1        | (0.9 - 1.2)        |
| Brain                  | 15                                     | 0         | (-3 - 4)         | 1.0        | (0.6 - 1.5)        |
| Colorectal             | 174                                    | -6        | (-16 - 4)        | 0.9        | (0.8 - 1.0)        |
| Melanoma               | 92                                     | -12       | (-20 - -3)       | 0.8        | (0.7 - 0.9)        |
| Non-Hodgkin Lymphoma   | 40                                     | -5        | (-9 - 1)         | 0.8        | (0.6 - 1.0)        |
| Leukaemia              | 28                                     | -4        | (-7 - 1)         | 0.8        | (0.6 - 1.0)        |
| Testicular             | 2                                      | -4        | (-7 - 7)         | 0.5        | (0.1 - 1.9)        |
| Prostate               | 199                                    | -104      | (-115 - -92)     | 0.4        | (0.4 - 0.5)        |
| <b>All Cancers</b>     | <b>1423</b>                            | <b>39</b> | <b>(11 - 68)</b> | <b>1.1</b> | <b>(1.0 - 1.1)</b> |

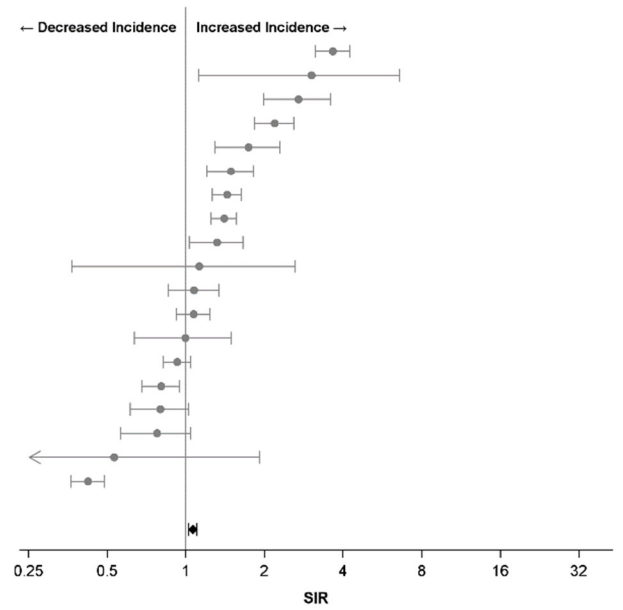

### Supplementary Figure 5B: Cancer incidence rate and SIR by cancer type – transplant

| Cancer Type            | Incidence Rate<br>(per 100,000 pt-yrs) | SRD        | 95% CI             | SIR        | 95% CI             |
|------------------------|----------------------------------------|------------|--------------------|------------|--------------------|
| Non-Hodgkin Lymphoma   | 218                                    | 161        | (140 - 184)        | 7.8        | (6.9 - 8.8)        |
| Kidney                 | 140                                    | 93         | (77 - 110)         | 7.8        | (6.7 - 9.0)        |
| Gynaecological         | 260                                    | 179        | (141 - 223)        | 4.4        | (3.7 - 5.3)        |
| Hodgkin Lymphoma       | 11                                     | 8          | (3 - 16)           | 4.0        | (2.1 - 6.8)        |
| Bladder                | 57                                     | 42         | (29 - 57)          | 3.6        | (2.8 - 4.6)        |
| Thyroid                | 25                                     | 13         | (6 - 21)           | 2.4        | (1.7 - 3.5)        |
| Multiple Myeloma       | 21                                     | 10         | (4 - 19)           | 2.3        | (1.5 - 3.4)        |
| Melanoma               | 169                                    | 78         | (60 - 98)          | 2.3        | (2.0 - 2.6)        |
| Head and Neck          | 71                                     | 32         | (21 - 46)          | 2.3        | (1.8 - 2.8)        |
| Unknown Primary        | 39                                     | 23         | (12 - 37)          | 2.2        | (1.6 - 2.9)        |
| Testicular             | 14                                     | 7          | (-1 - 20)          | 1.9        | (0.9 - 3.5)        |
| Bone                   | 2                                      | 1          | (-1 - 5)           | 1.6        | (0.2 - 5.9)        |
| Brain                  | 16                                     | 5          | (0 - 13)           | 1.6        | (1.0 - 2.5)        |
| Other Gastrointestinal | 82                                     | 28         | (14 - 44)          | 1.6        | (1.3 - 2.0)        |
| Lung                   | 98                                     | 29         | (14 - 47)          | 1.5        | (1.2 - 1.8)        |
| Colorectal             | 133                                    | 37         | (19 - 58)          | 1.4        | (1.2 - 1.7)        |
| Breast                 | 225                                    | 28         | (-4 - 64)          | 1.2        | (1.0 - 1.4)        |
| Leukaemia              | 21                                     | 2          | (-4 - 11)          | 1.1        | (0.7 - 1.7)        |
| Prostate               | 146                                    | -58        | (-80 - -33)        | 0.7        | (0.6 - 0.8)        |
| <b>All Cancers</b>     | <b>1493</b>                            | <b>675</b> | <b>(617 - 736)</b> | <b>2.1</b> | <b>(2.0 - 2.2)</b> |

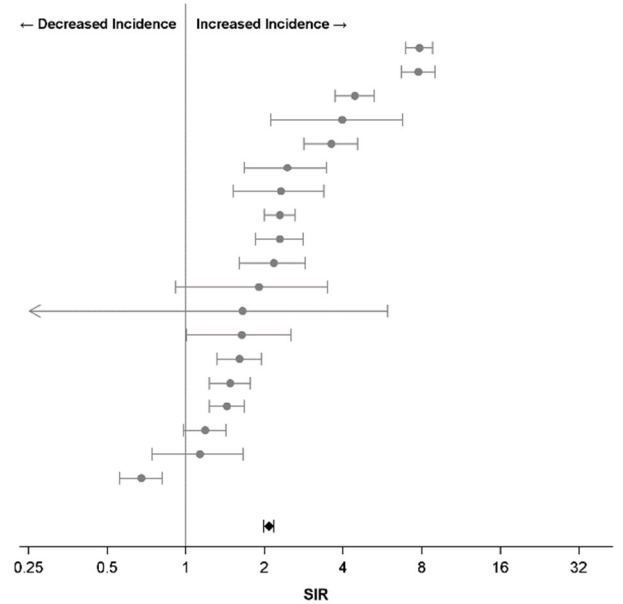

SIR - Standardized Incidence Ratio. SRD - Standardized Rate Difference. SRDs are presented in comparison with the general population. Non-Hodgkin lymphoma includes post-transplant lymphoproliferative disorder. Gynaecological cancers include cervical, uterine and ovarian cancers.
